# Supplementary material for: Fluorescent “OFF–ON” Sensors for the Detection of Sn2+ Ions Based on Amine-Functionalized Rhodamine 6G
Source: MDPI journal article supplement (doi:10.3390/chemosensors10020069), 2022-02-09
Supplement: s1 [file s1]

# Fluorescent “OFF–ON” Sensors for the Detection of Sn<sup>2+</sup> Ions Based on Amine-Functionalized Rhodamine 6G

Balamurugan Rathinam <sup>1</sup>, Vajjiravel Murugesan <sup>2</sup> and Bo-Tau Liu <sup>1,\*</sup>

<sup>1</sup> Department of Chemical and Materials Engineering, National Yunlin University of Science and Technology, Yunlin 64002, Taiwan; balar@yuntech.edu.tw

<sup>2</sup> Department of Chemistry, B.S. Abdur Rahman Crescent Institute of Science and Technology, Chennai 600 048, India; vajjiravel\_m@crescent.education

\* Correspondence: liubo@yuntech.edu.tw; Tel.: +886-5-534-2601; Fax: +886-5-531-2071

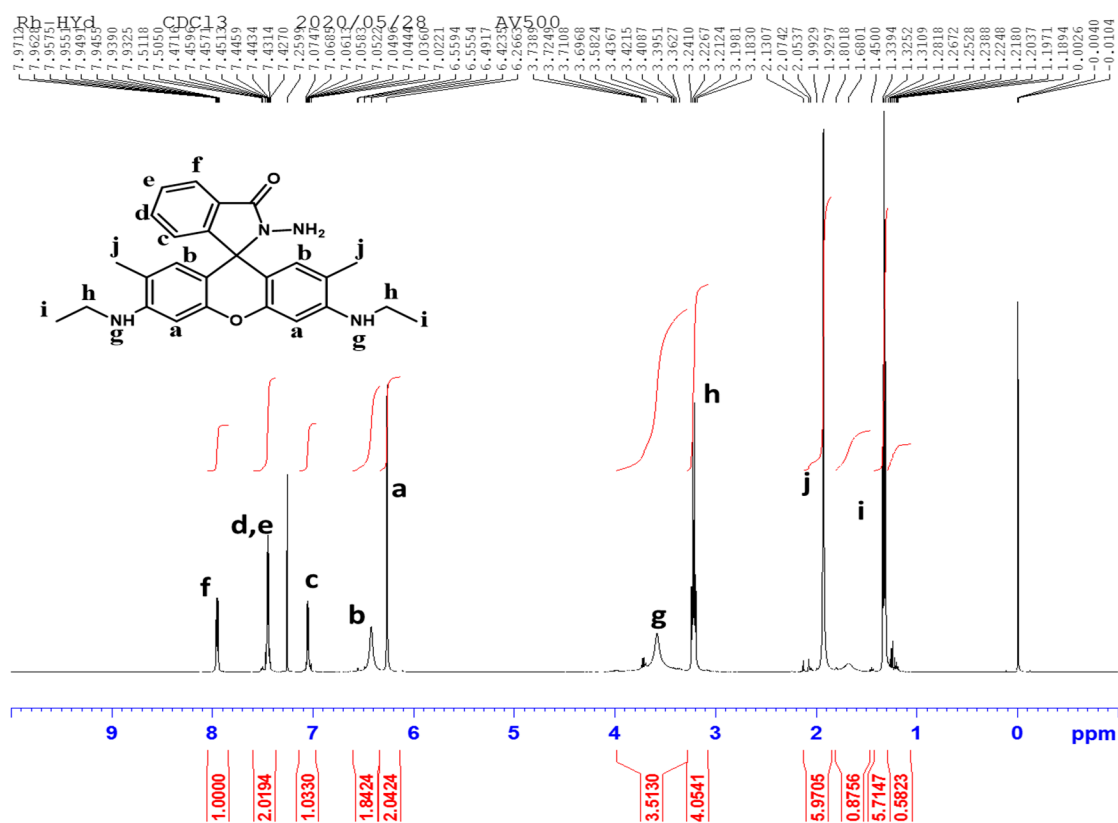

Figure S1. <sup>1</sup>H-NMR spectrum of Rh-Hyd in CDCl<sub>3</sub>.

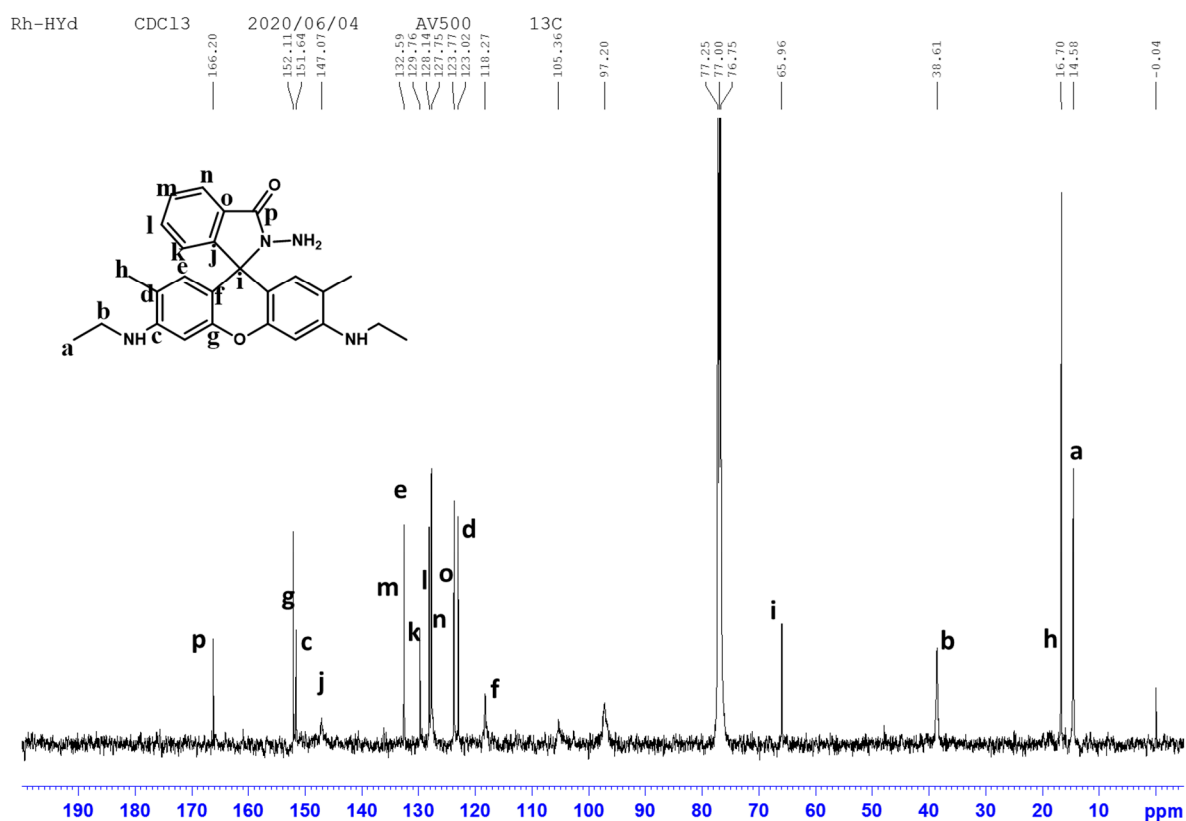

Figure S2.  $^{13}\text{C}$ -NMR spectrum of Rh-Hyd in  $\text{CDCl}_3$ .

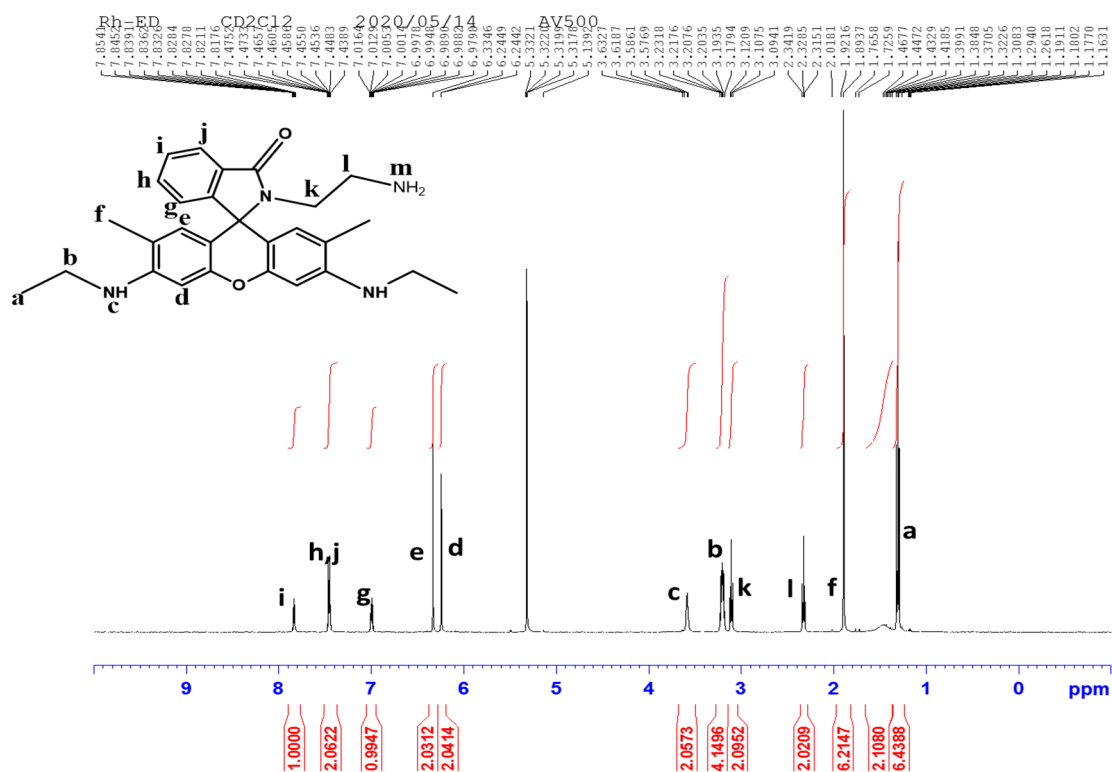

Figure S3.  $^1\text{H}$ -NMR spectrum of Rh-ED in  $\text{CDCl}_3$ .

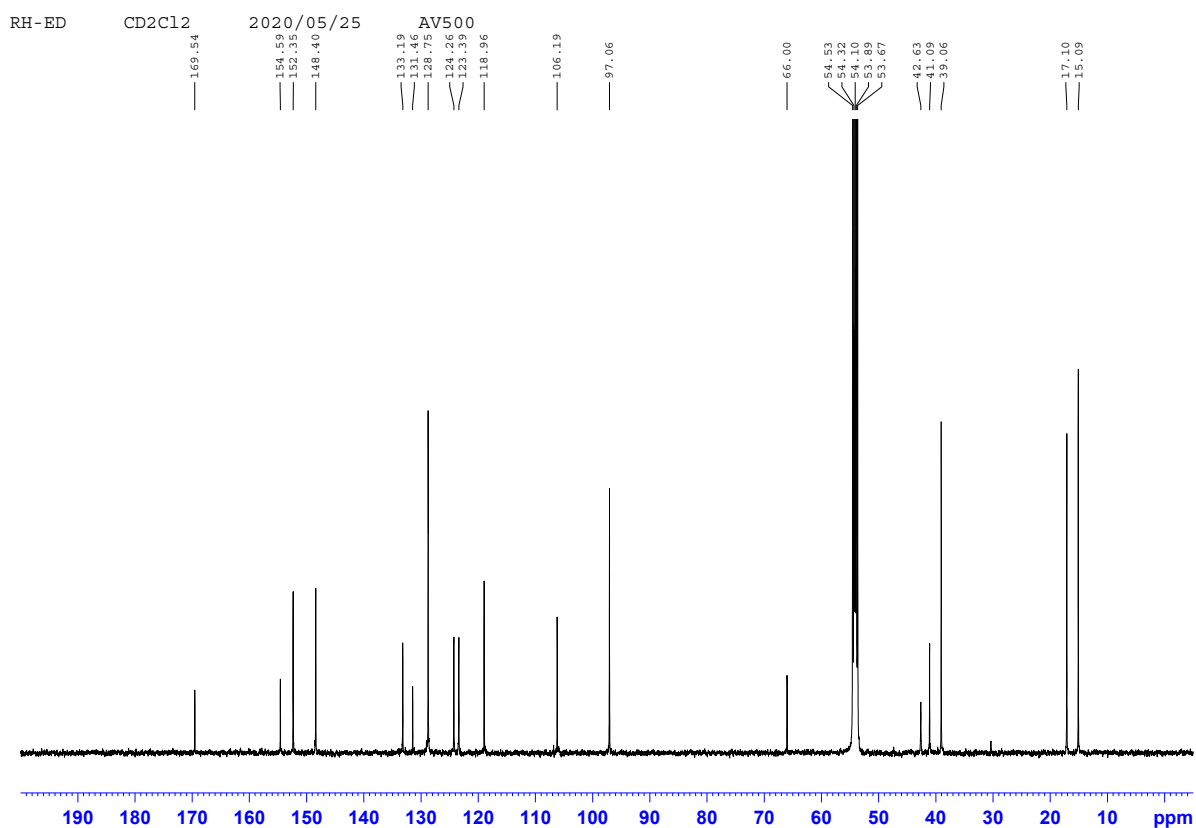

Figure S4.  $^{13}\text{C}$ -NMR spectrum of Rh-ED in  $\text{CDCl}_3$ .

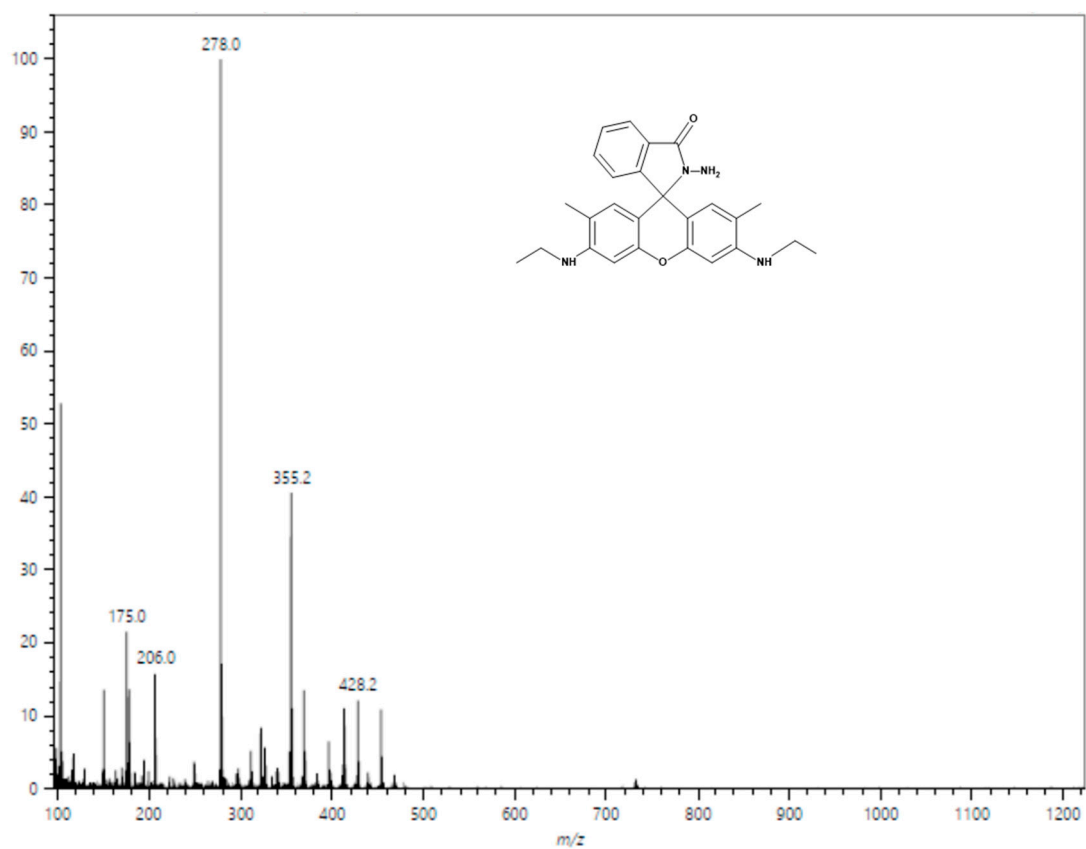

Figure S5. Mass spectrum of Rh-Hyd.

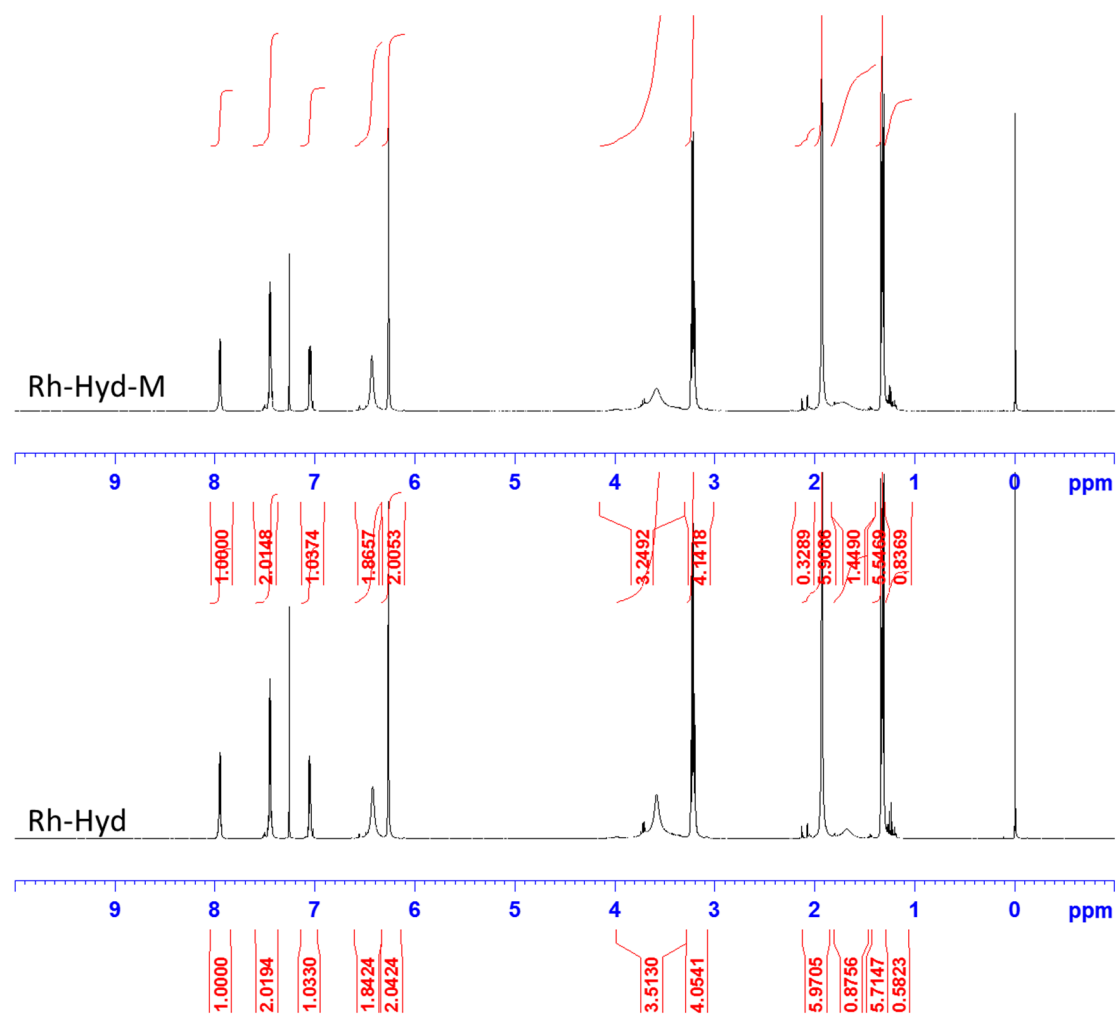

Figure S6. Comparison of  $^1\text{H}$ -NMR spectra of Rh-Hyd and its complexes with  $\text{Sn}^{2+}$ .

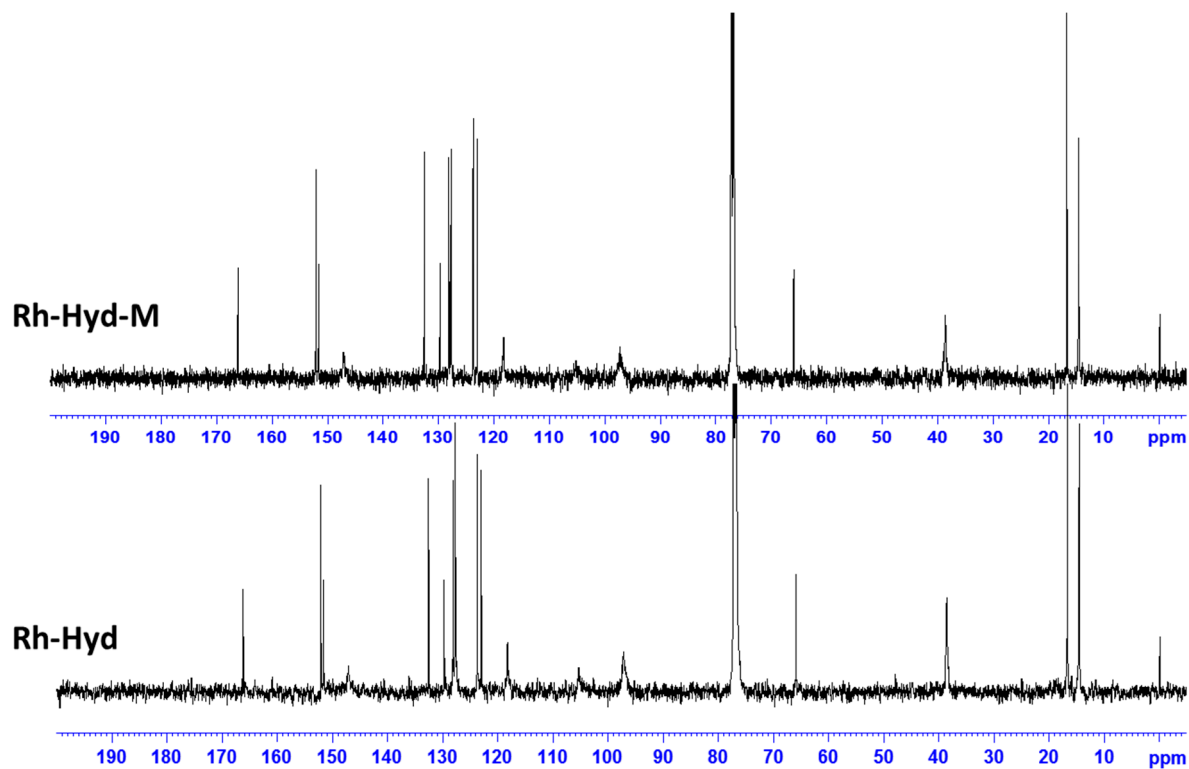

Figure S7. Comparison of  $^{13}\text{C}$ -NMR spectra of Rh-Hyd and its complexes with  $\text{Sn}^{2+}$ .

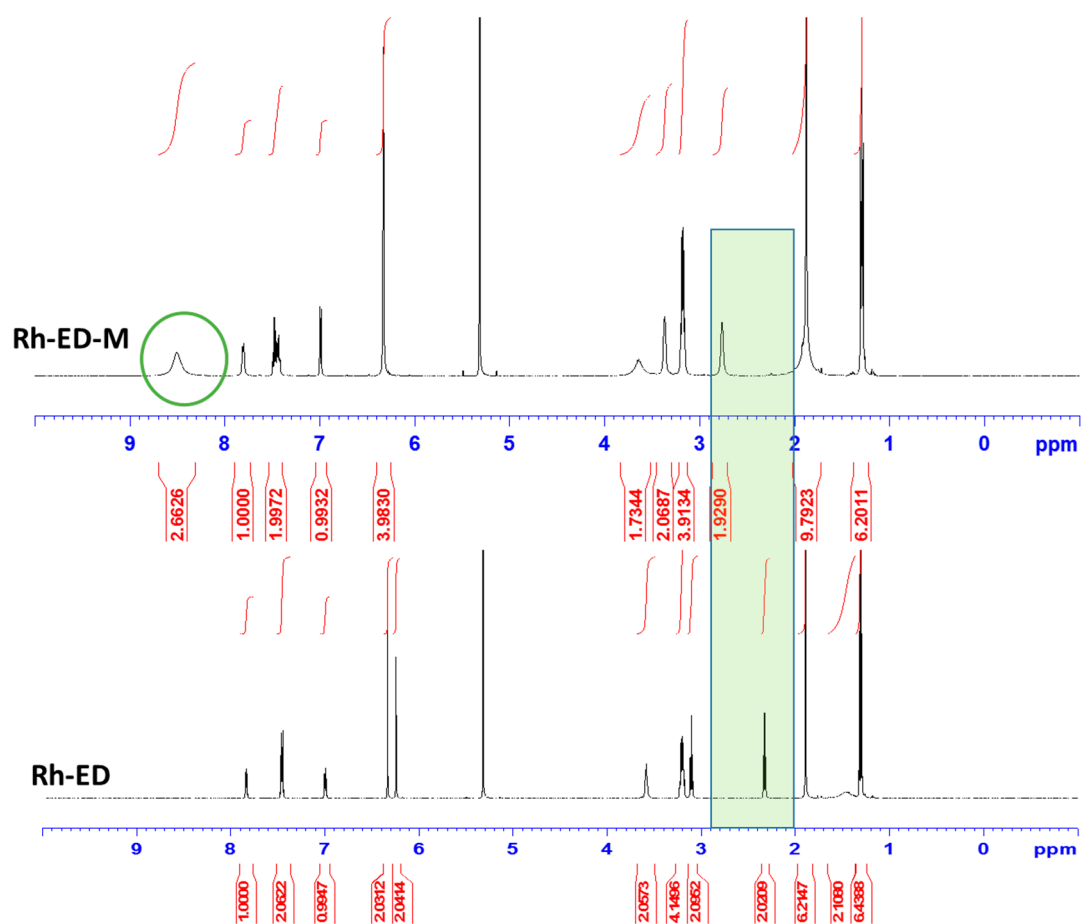

Figure S8. Comparison of  $^1\text{H}$ -NMR spectra of Rh-ED and its complexes with  $\text{Sn}^{2+}$ .

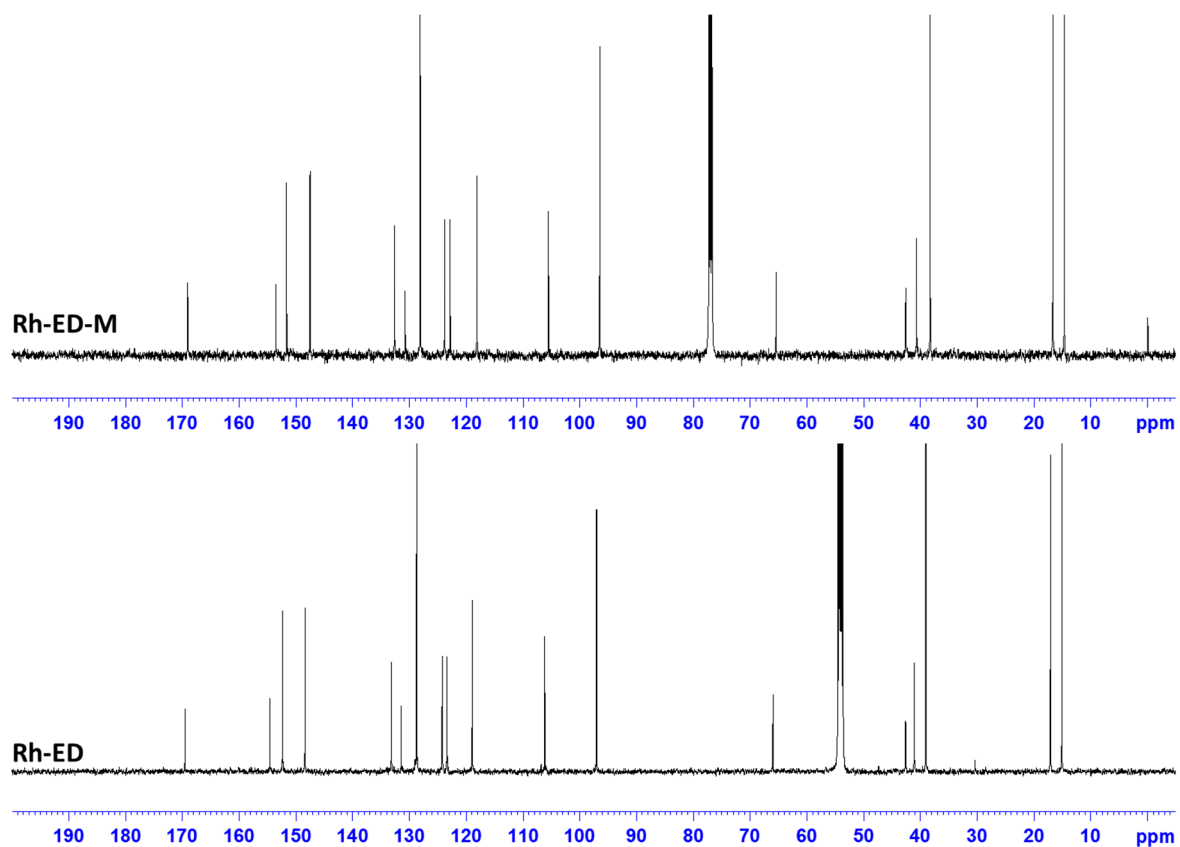

Figure S9. Comparison of  $^{13}\text{C}$ -NMR spectra of Rh-ED in  $\text{CD}_2\text{Cl}_2$  and its complexes with  $\text{Sn}^{2+}$  in  $\text{CDCl}_3$ .

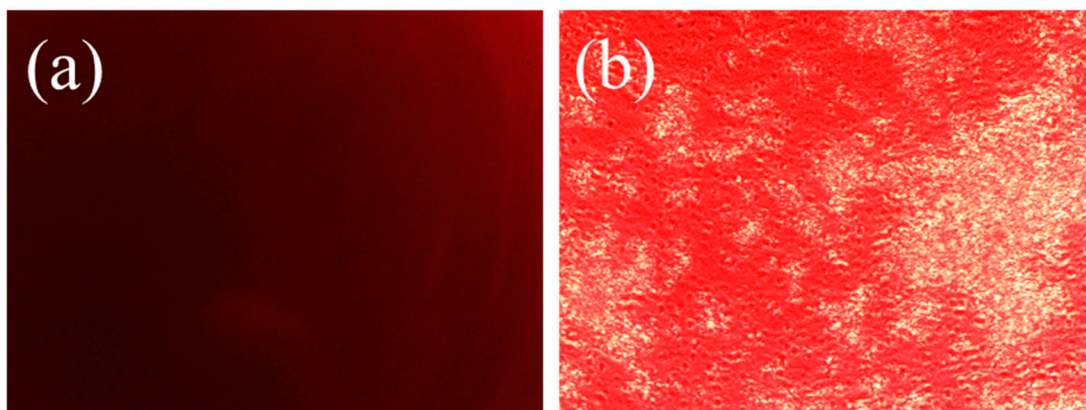

**Figure S10.** Fluorescence images of (a) Rh-Hyd and (b) the respective  $\text{Sn}^{2+}$  complex (magnification 10x).

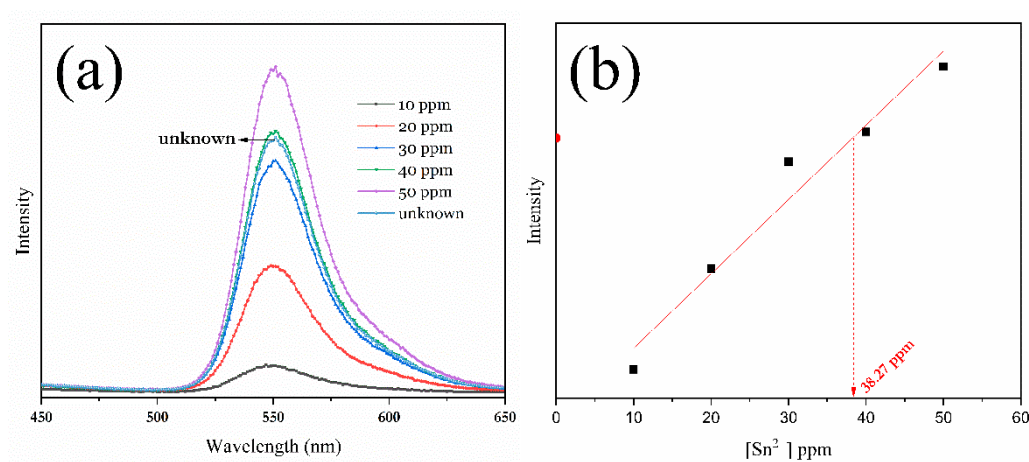

**Figure S11.** (a) Fluorescent spectra of Rh-Hyd with  $\text{SnCl}_2$  of known and unknown concentration samples, and (b) the corresponding calibration curve.

The determination of total tin content is based on the following calculation: 1 mL of ethanolic solution of aminophenol containing =  $(0.789 \times 38.27) \text{ ppm} = 30.20 \times 10^{-6} \text{ g}$  of  $\text{SnCl}_2$ . Thus,  $30.20 \times 10^{-6} \text{ g}$  of  $\text{SnCl}_2$  containing =  $[(118.71/189.6) \times 30.20 \times 10^{-6}] = 18.91 \times 10^{-6} \text{ g}$  of Sn. Therefore, 63 mg of aminophenol containing =  $(18.91 \times 10^{-6}/0.063) = 300.2 \text{ ppm}$  of Sn.
